# Supplementary material for: Single-cell profiling reveals the importance of CXCL13/CXCR5 axis biology in lymphocyte-rich classic Hodgkin lymphoma
Source: PubMed Central journal article supplement (PMC8521678; doi:10.1073/pnas.2105822118), 2021-10-06
Supplement: pnas.2105822118.sapp.pdf [file pnas.2105822118.sapp.pdf]

## SUPPLEMENTAL DATA

### **Single cell profiling reveals the importance of CXCL13/CXCR5 axis biology in lymphocyte rich classic Hodgkin lymphoma**

Tomohiro Aoki<sup>1,2\*</sup>, Lauren C. Chong<sup>1\*</sup>, Katsuyoshi Takata<sup>1,3</sup>, Katy Milne<sup>4,5</sup>, Ashley Marshall<sup>4,5</sup>, Elizabeth A. Chavez<sup>1</sup>, Tomoko Miyata-Takata<sup>1</sup>, Susana Ben-Neriah<sup>1</sup>, Doria Unrau<sup>4,5</sup>, Adele Telenius<sup>1</sup>, Merrill Boyle<sup>1</sup>, Andrew P. Weng<sup>6</sup>, Kerry J. Savage<sup>1</sup>, David W. Scott<sup>1</sup>, Pedro Farinha<sup>1,2</sup>, Sohrab P. Shah<sup>2,7,8</sup>, Brad H. Nelson<sup>4,9</sup> and Christian Steidl<sup>1</sup>

<sup>1</sup>Centre for Lymphoid Cancer, BC Cancer, Vancouver, British Columbia, Canada.

<sup>2</sup>Department of Pathology and Laboratory Medicine, University of British Columbia, Vancouver, British Columbia, Canada.

<sup>3</sup>Division of Molecular and Cellular Pathology, Niigata University Graduate School of Medical and Dental Sciences

<sup>4</sup>Deeley Research Centre, BC Cancer, Victoria, British Columbia, Canada.

<sup>5</sup>Department of Biochemistry and Microbiology, University of Victoria, Victoria, British Columbia, Canada.

<sup>6</sup>Terry Fox Laboratory, BC Cancer, Vancouver, British Columbia, Canada.

<sup>7</sup>Department of Molecular Oncology, BC Cancer, Vancouver, British Columbia, Canada.

<sup>8</sup>Department of Epidemiology and Biostatistics, Memorial Sloan Kettering Cancer Center, New York, New York.

<sup>9</sup>Department of Medical Genetics, University of British Columbia, Vancouver, British Columbia, Canada

\* - equal contribution

#### **Corresponding Author:**

Christian Steidl, MD

BC Cancer Research Centre,

675 West 10th Ave, Room 12-110, Vancouver, BC V5Z 1L3, Canada

E-mail: [CSteidl@bccancer.bc.ca](mailto:CSteidl@bccancer.bc.ca)

Phone (office): 604-675-8046

[FAX:604-675-8183](tel:604-675-8183)

**This PDF file includes:**

Supplementary text  
Figures S1 to S10  
SI References  
Tables S1 to S8

**Other supplementary materials for this manuscript include the following:**

Dataset 1

## Supplementary Information Text

### Materials and Methods

**Single cell RNA sequencing sample preparation.** Samples for scRNA-seq were prepared as previously described<sup>1</sup>. In brief, cell suspensions from CHL tumors or reactive lymph node were rapidly thawed at 37°C, washed in 10ml of RPMI1640/10% fetal bovine serum (FBS) solution DNase I (Millipore Sigma, Darmstadt, Germany) and washed in PBS. Cells were resuspended in PBS containing 3% FBS and stained with DAPI (Sigma-Aldrich, St. Louis, MO) for 15 min at 4°C in the dark. Viable cells were sorted on a FACS Fusion (BD Biosciences) using an 85 µm nozzle. Sorted cells were collected in 0.5 ml of medium, centrifuged and diluted in RPMI1640/10% FBS.

**Library Preparation and single-cell RNA sequencing.** In total, 8700 cells per sample were loaded into a Chromium Single Cell 3' Chip kit v2 (PN-120236) and processed according to the Chromium Single Cell 3' Reagent kit v2 User Guide. Libraries were constructed using the Single Cell 3' Library and Gel Bead Kit v2 (PN-120237) and Chromium i7 Multiplex Kit (PN-120262). Single cell libraries from two samples were pooled and sequenced on one HiSeq 2500 125 base PET lane. CellRanger software (v2.1.0; 10X Genomics) was used to demultiplex the raw data, generate quality metrics, and generate per-gene count data for each cell.

**Normalization and batch correction.** Analysis and visualization of scRNA-seq data was performed as described previously<sup>1</sup> in the R statistical environment (v3.6.1).

Cell Ranger count data from all cells ( $n = 150,611$ ) were read into a single ‘SingleCellExperiment’ object. Cells were filtered if they had  $\geq 20\%$  reads aligning to mitochondrial genes, or if their total number of detected genes was  $\geq 3$  median absolute deviations from the sample median. This yielded a total of 146,437 cells for analysis. The scran package (v1.14.5) was used to compute cell-specific sum factors with the method described by Lun et al<sup>2</sup>. Briefly, quick-clustering was performed to identify pools of cells with similar expression profiles, and size factors were calculated for each pool by normalizing summed expression profiles against the full set of expression profiles. The pool-based size factors were then deconvolved to generate sum factors for each cell<sup>2</sup>. The scater package (v1.14.6) was used to log-normalize the count data using the cell-specific sum factors.

To remove batch effects resulting from different chips and library preparation, the mutual nearest neighbors (MNN) batch correction technique in the scran package was utilized. Biologically relevant genes were first identified by fitting a mean-dependent trend to the gene-specific variances, then decomposing the variance into biological and technical components and selecting genes with positive biological components. Fast MNN correction was then performed on the expression of these genes, grouping cells by their chip. This produced a matrix of corrected low-dimensional ( $d = 50$ ) coordinates for each cell, which was used as input for downstream analyses.

**Clustering and annotation.** Unsupervised clustering was performed with the PhenoGraph algorithm<sup>4</sup>, using the first 10 MNN-corrected components as input. Clusters from PhenoGraph were manually assigned to a cell type by comparing the mean

expression of known markers across cells in a cluster. Markers used to type cells included CD19 (B cells), CD27, IGHD (Naïve B cell), CD8, CD3, CD4 (T cells), NCAM1 (NK cells), GZMA, GZMK (cytotoxic T cells, NK cells), FOXP3, IL2RA, IKZF2, CTLA4, LAG3, TNFRSF18 (Tregs), IFNG, TBX21 (Th1 cells) GATA3, IL4, IL13 (Th2 cells), CD161, CCR4 (Th17 cells), PDCD1, CXCR5, BCL6 (TFH cells), CCR7, IL7R, LEF1 (Naive T cells), CD25, CD69 (activated T cells) and CD68 (Macrophages). CD4<sup>+</sup> helper T cells (as defined by cluster assignment) were further classified into subsets according to positivity (normalized log-transformed expression > 0) and negativity of various markers. The following criteria were used: (1) Th1 cells were positive for either IFNG or TBX21 (T-bet), and negative for CCR4; (2) Th2 cells were positive for any of IL4, IL13, PTGDR2 (CD294), or GATA3; (3) TFH cells were positive for at least 2 of PDCD1 (PD-1), CXCR5 and BCL6, and negative for both CCR7 and FOXP3; (4) Th17 cells were positive for both KLRB1 (CD161) and CCR4. We also used marker expression to identify TFH-specific subsets using the following criteria: (1) “CXCL13+CXCR5- TFH” cells were positive for PDCD1 (PD-1), CXCL13 and ICOS, and negative for CXCR5; (2) “CXCL13-CXCR5+ TFH” cells were positive for either PDCD1 (PD-1) or ICOS, positive for CXCR5, and negative for CXCL13.

For visualization purposes, tSNE transformation was performed with the scater package using the first 10 MNN-corrected components as input. All differential expression results were generated using the *findMarkers* function of the scran package, which performs gene-wise t-tests between pairs of clusters, and adjusts for multiple testing with the Benjamini-Hochberg method.

**Diffusion map analysis.** To examine cell trajectories in the scRNA-seq data, the diffusion map algorithm<sup>5</sup> was run as implemented in the scater package using the first 10 MNN-corrected components as input. To identify potential signatures associated with the first two diffusion map dimensions, gene signature lists described in Azizi et al. were used<sup>3</sup>. For each signature, the Pearson correlation between expression of each gene and the dimension score was calculated, and the mean correlation value across all genes in the signature was taken (*SI Appendix, Fig. S6C-D*). Additionally, individual genes most highly related to the first two dimensions were identified by calculating Pearson correlations for every gene, and expression of the top 4 positively/negatively correlated genes were visualized in diffusion map space (**Fig. 2G, *SI Appendix, Fig. S6B***).

**iTALK analysis.** The iTALK R toolkit<sup>6</sup> (v0.1.0) was used to identify potential receptor/ligand interactions in the single-cell RNAseq data. Cells were classified into broad subtypes based on their cluster assignments (i.e. T helper cells, B cells), and for each subtype differential expression (DE) was performed between cells originating from LR-CHL samples and other CHL samples (see above for DE methodology). The DE results labeled by cell type were passed into the *FindLR* function (datatype = “DEG”) to identify interactions for all communication types. Interactions were ordered using a score calculated by multiplying the log fold-change of both cell types (cell\_from\_logFC \* cell\_to\_logFC) and taking the absolute value. The top 10 interactions with the highest score were passed to the *LRPlot* function for visualization.

**Tissue microarray (TMA) construction, single color IHC.** For TMA construction, 1.5mm duplicate cores were obtained from representative areas containing HRS cells of 37 diagnostic biopsies of LR-CHL. The diagnosis was made according to the WHO classification<sup>7</sup>. For IHC staining, 4µm slides of the TMA and antibodies listed in *SI Appendix, Table S6* were used. Staining was performed on a Benchmark XT platform (Roche Diagnostics, USA) or IntelliPATH platform (Biocare Medical, USA). The slides were independently scored by KT, TT and PF. Evaluation of tumor and microenvironment cells (CD20, CXCL13, CXCR5, CD3, TGF-β, PD-1 and PD-L1) was performed, and relative percentage of positive cells in relation to overall cellularity (scored from 0-100% in 10% increments) was reported as an average of both duplicate cores as previously described<sup>8</sup>. PD-L1 and TGF-β expression were quantified by assigning a histoscore out of 300, which was calculated by multiplying the value for staining intensity (0-3) with the percentage of positive cells (0-100%). An optimal cut-off for the histoscore was chosen by a hematopathologist to produce the strongest discrimination between the respective groups. PD-L1 protein expression positivity (on HRS cells) was defined as ≥ 80% positive HRS cells. TGF-β protein expression positivity (on HRS cells) was defined as ≥ 10% positive HRS cells. The thresholds used to assign positivity for other IHC markers were determined by selecting the optimal values to maximize Cox proportional hazard ratios on PFS and OS. This analysis was performed in R (4.0.2) using the survMisk package (0.5.5). To assess the percentage of HRS cells surrounded by CXCL13<sup>+</sup> and PD-1<sup>+</sup> T cells, we counted the number of tumor cells in each core and determined the percentage of HRS cells with a rosetting T cell pattern. A

rosetted HRS cell was defined as one in which greater than 50% of the cell's circumference was occupied by CXCL13<sup>+</sup> or PD-1<sup>+</sup> cells<sup>9</sup>.

**Multi-color IHC on TMA, scanning and image analysis.** TMA slides were deparaffinized in xylene and rinsed with dH<sub>2</sub>O. Antigen retrieval was performed in AR6 buffer (PerkinElmer, USA) with Diva decloaker (Biocare Medical, USA). The primary antibody for PD-1 was incubated for 30min in an Intellipath FLX rack at room temperature, followed by detection using the Mach2 mouse HRP with 10 min incubation. Visualization of PD-1 was achieved using Opal 620. The slide was placed into AR6 buffer and heated using a microwave. In serial order, the slide was incubated with primary antibody for CD4, followed by detection using Mach2 mouse HRP, and visualization was accomplished using Opal 690. The slide was again placed into AR6 buffer and heated using a microwave. Then the primary antibody for BCL6 was incubated, followed by detection of Mach2 mouse HRP and Opal 520 for visualization. The slide was placed into AR6 buffer for microwaving. The primary antibody for CD20 was incubated, followed by detection of Mach2 rabbit HRP and visualization for Opal 540. Microwave heating was repeated with AR6 buffer. The primary antibody for CXCR5 was incubated, followed by detection of Mach2 rabbit HRP and visualization for Opal 570. Microwave heating was repeated again with AR6 buffer. The primary antibody for CD30 was incubated, followed by detection of Mach2 HRP and visualization for Opal 650. The primary antibody for CXCL13 was incubated, followed by detection of Mach2 HRP and visualization for Opal 480. Nuclei were visualized with DAPI staining and the section was coverslipped using Fluoro Care Anti-Fade Mountant. TMA slides were



scanned using the Vectra multispectral imaging system (v3.0.7; PerkinElmer, USA) following manufacturer's instructions to generate .im3 image cubes for downstream analysis. Optimal exposure times for fluorophores ranged between 50 and 200ms. To analyze the spectra for all fluorophores included, inForm image analysis software (v2.4.10; PerkinElmer, USA) was used. Cells were first classified into tissue categories using DAPI and CD30 to identify CD30<sup>+</sup>DAPI<sup>+</sup>, CD30<sup>-</sup>DAPI<sup>+</sup>, and CD30<sup>-</sup>DAPI<sup>-</sup> areas via manual circling and training. The CD30<sup>+</sup>DAPI<sup>+</sup> regions were considered to be HRS-surrounding regions. Cells were then phenotyped as positive or negative for each of the seven markers (PD-1, CXCR5, CXCL13, BCL6, CD20, CD4 and CD30) using a supervised machine learning approach trained on manually annotated positive/negative cells in representative images (inForm method). Data were merged in R by X-Y coordinates so that each cell could be assessed for all markers simultaneously. Nearest neighbor analysis was performed with the spatstat R package (v1.64-1). Within-distance and density analyses were performed using the rtree package (v0.1.0).

**Cell isolation and purification of human T cells.** We purified CD4<sup>+</sup> T lymphocytes from peripheral blood mononuclear cells (PBMCs) by negative selection using the untouched CD4 T cell Isolation Kit II (Miltenyi Biotec, Auburn, CA) according to the manufacturer's instructions. Isolated CD4<sup>+</sup> cells were stimulated with soluble monoclonal antibodies to CD3 (2 µg/ml, OKT3, eBioscience, San Diego, CA, USA) and CD28 (1 µg/ml, clone CD28.2, Biolegend, San Diego, CA, USA) and incubated in culture medium in the presence or absence of TGF-β (10 ng/ml, Cell Signaling Technology, Danvers, MA, USA) in Iscove's Modified Dulbecco's Media (IMDM) GlutaMAX<sup>™</sup> supplement (Life

Technologies) supplemented with 10% fetal bovine serum (FBS) solution, and 100 U/ml penicillin-streptomycin (Thermo Fisher Scientific, Waltham, MA, USA). At the end of day 5, we washed and analyzed the T cells using flow cytometry for characterization.

**Flow cytometry.** To characterize T cells *in vitro*, we used a panel of antibodies (described in *SI Appendix, Table S7*) and Live/Dead Fixable Yellow (Life Technologies). Briefly, cells from T cell cultures were washed in PBS/2% FBS solution. Cell suspensions from CHL tumors or reactive lymph node were rapidly defrosted at 37C, washed in 10ml of RPMI1640/10% fetal bovine serum (FBS) solution containing DNase I (Millipore Sigma, Darmstadt, Germany) and washed in PBS. Cells were stained with the antibody cocktail for 15 minutes on ice in the dark and assessed using flow cytometry (LSRFortessa or FACSymphony, BD, Franklin Lakes, NJ, USA). For cytokine intracellular staining, cells were permeabilized using the Fixation/Permeabilization Solution Kit (BD) according to the manufacturer's instructions. Flow cytometry data were analyzed using FlowJo software (v10.2; TreeStar, Ashland, OR, USA) (*SI Appendix, Fig. S10*). Statistical analyses were performed using GraphPad Prism Version 7 (GraphPad Software Inc., La Jolla, CA).

**Fluorescence immunophenotyping and interphase cytogenetics as a tool for investigation of neoplasms.** Fluorescence immunophenotyping and interphase cytogenetics as a tool for investigation of neoplasms (FICTION) was performed as previously described.<sup>10,11</sup>. In brief, formalin-fixed paraffin-embedded tissue (FFPET) tumors, represented as duplicate 1.5 mm cores on tissue microarray (TMA) were

subjected to immunohistochemistry for CD30 (Primary antibody: Monoclonal mouse anti-human CD30, clone Ber-H2, DAKO; Secondary antibody: Alexa-Fluor 594 goat anti-mouse IgG, Invitrogen). Then, probe and target DNA were co-denatured for 5 min at 83C and hybridized at 37C overnight. The following in-house bacterial artificial chromosome (BAC) clones targeting 9p24.1 chromosome was used: RP11-963L3 and RP11-12D24 (PD-L1), RP11-207C16 and RP11-845C2 (PD-L2) as previously described<sup>11</sup>. The frequency of false positive amplifications for the BAC FISH probe was established by hybridization to reactive lymph node cells with mean proportion of cells with 3 or more signals of 7.5%. For the purpose of this study the cut-off value for true gains (3-5 signals) was set at > 20% and the cut-off value for amplifications (6 or more signals) was set at 10%, scoring a minimum of 20 interphase CD30<sup>+</sup> cells. Slides were analyzed using a Carl Zeiss Axio Imager Z2 microscope equipped with a Plan Apochromat 63x/1.4 oil objective. The images were acquired using a Cool Cube Digital CCD and Metasystems software (version 5.5.10).

**Survival analysis.** Overall survival (OS, death from any cause) and progression-free survival (PFS, the time from initial diagnosis to the date of disease progression or relapse/death from any cause) were analyzed using the Kaplan-Meier method and results were compared using a log rank test. Univariate Cox regression analyses were performed to assess the effects of prognostic factors. High proportion of PD-1 positive cells was defined as  $\geq 10\%$  positive leukocytes as described before<sup>12</sup>. The cutoffs for proportions of CXCL13<sup>+</sup> cells were determined by Cox proportional hazard based analyses using survMisk package. High proportion of CXCL13 positive cells was defined as greater than

5% positive leukocytes. The cutoffs for proportions of CD4<sup>+</sup>PD-1<sup>+</sup>CXCL13<sup>+</sup> cells was determined by Cox proportional hazard based analyses using survMisk package. High proportion of CD4<sup>+</sup>PD-1<sup>+</sup>CXCL13<sup>+</sup> cells was defined as greater than 2% positive cells in MC-IHC data. Survival analyses were performed in the R statistical environment (v3.6.1).

**Statistical results & visualization.** All t-tests reported are two-sided Student's t-tests, and P-values < 0.05 were considered to be statistically significant. Fisher's exact test was used to compare clinical and patient characteristics. In all box plots, boxes represent the interquartile range with a horizontal line indicating the median value. Whiskers extend to the farthest data point within a maximum of 1.5 × the interquartile range, and colored dots beyond the whiskers represent outliers.

**Data availability.** Single cell RNA-seq counts (generated with CellRanger v2.1.0) and a merged 'SingleCellExperiment' R object will be available in the EGA (EGAS00001005541) via controlled access

## SI References

1. Aoki T, Chong LC, Takata K, et al. Single-Cell Transcriptome Analysis Reveals Disease-Defining T-cell Subsets in the Tumor Microenvironment of Classic Hodgkin Lymphoma. *Cancer Discov.* 2020;10(3):406-421.
2. Lun AT, Bach K, Marioni JC. Pooling across cells to normalize single-cell RNA sequencing data with many zero counts. *Genome Biol.* 2016;17:75.
3. Azizi E, Carr AJ, Plitas G, et al. Single-Cell Map of Diverse Immune Phenotypes in the Breast Tumor Microenvironment. *Cell.* 2018;174(5):1293-1308 e1236.
4. Levine JH, Simonds EF, Bendall SC, et al. Data-Driven Phenotypic Dissection of AML Reveals Progenitor-like Cells that Correlate with Prognosis. *Cell.* 2015;162(1):184-197.
5. Haghverdi L, Buettner F, Theis FJ. Diffusion maps for high-dimensional single-cell analysis of differentiation data. *Bioinformatics.* 2015;31(18):2989-2998.
6. Wang Y, Wang R, Zhang S, et al. iTALK: an R Package to Characterize and Illustrate Intercellular Communication. *BioRxiv.* 2019.
7. SH S, E C, NL H, et al. WHO Classification of Tumours of Haematopoietic and Lymphoid Tissues. Revised 4th ed. Lyon, France: International Agency for Research on Cancer (IARC). 2017.
8. Steidl C, Lee T, Shah SP, et al. Tumor-associated macrophages and survival in classic Hodgkin's lymphoma. *N Engl J Med.* 2010;362(10):875-885.
9. Falini B, Bigerna B, Pasqualucci L, et al. Distinctive expression pattern of the BCL-6 protein in nodular lymphocyte predominance Hodgkin's disease. *Blood.* 1996;87(2):465-471.
10. Steidl C, Shah SP, Woolcock BW, et al. MHC class II transactivator CIITA is a recurrent gene fusion partner in lymphoid cancers. *Nature.* 2011;471(7338):377-381.
11. Twa DD, Chan FC, Ben-Neriah S, et al. Genomic rearrangements involving programmed death ligands are recurrent in primary mediastinal large B-cell lymphoma. *Blood.* 2014;123(13):2062-2065.
12. Hollander P, Kamper P, Smedby KE, et al. High proportions of PD-1(+) and PD-L1(+) leukocytes in classical Hodgkin lymphoma microenvironment are associated with inferior outcome. *Blood Adv.* 2017;1(18):1427-1439.

## Supplementary Figures



expression was performed according to cluster (see *SI Appendix, Materials and Methods*). Mean expression of the top 20 discriminatory genes for each cluster is shown (data has been scaled row-wise).

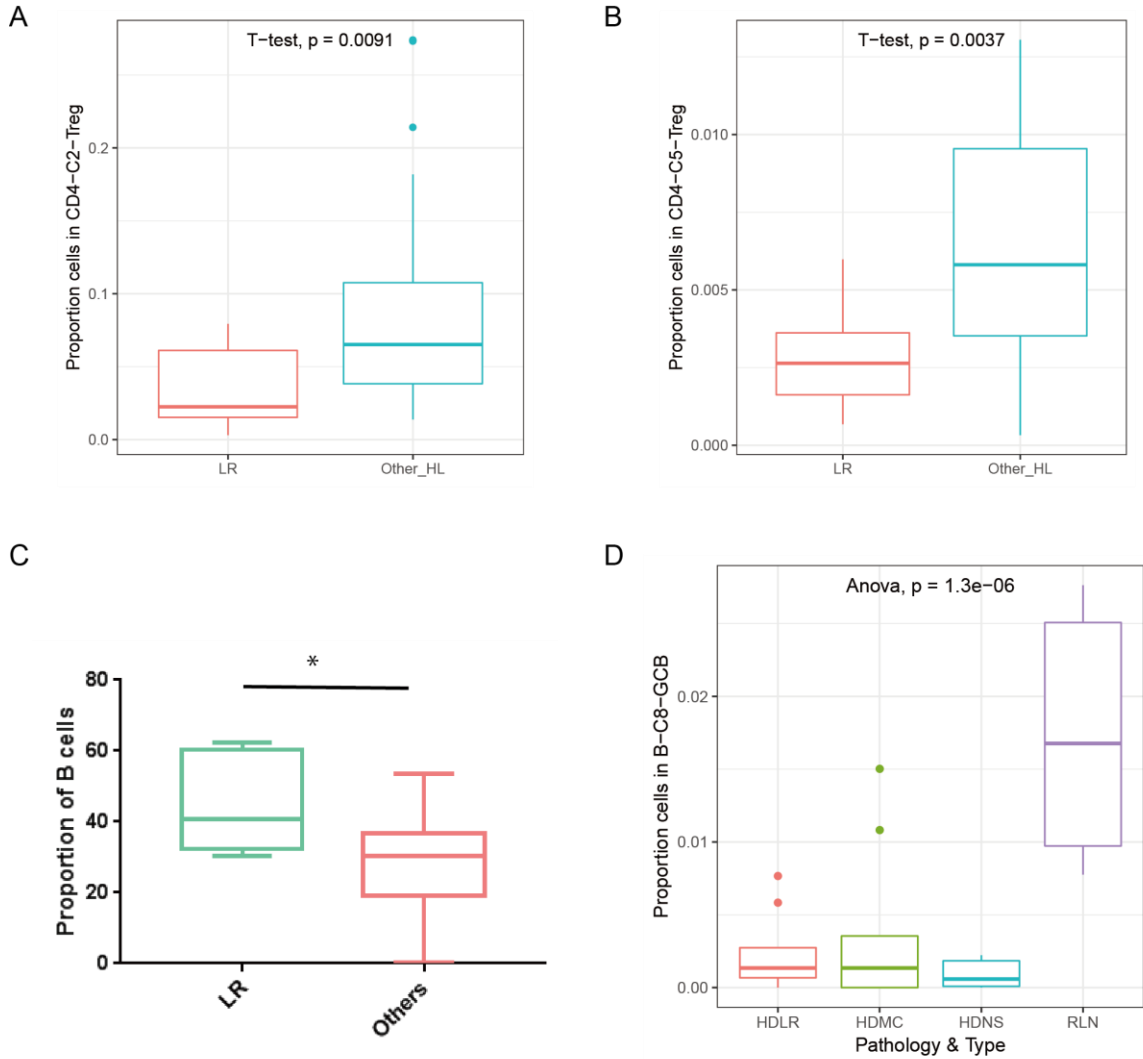

## Supplemental Figure 2

**Fig. S2. Proportion of cells assigned to immune cell subsets.** (A-B) Box plots summarizing the proportion of type 1 Treg (A; cluster “CD4-C2-Treg”) and classical FOXP3<sup>+</sup> Treg (B; cluster “CD4-C5-Treg”) cluster cells in each sample, separated

according to CHL subtype. (C) Box plot showing the proportion of B cells identified by flow cytometry for all samples, grouped by pathological subtype (n = 6). Data are shown as the mean  $\pm$  SEM (\*P < 0.05). (D) Box plot showing the proportion of germinal center B cells (cluster “B-C8-GCB”) for all samples, grouped by pathological subtype.

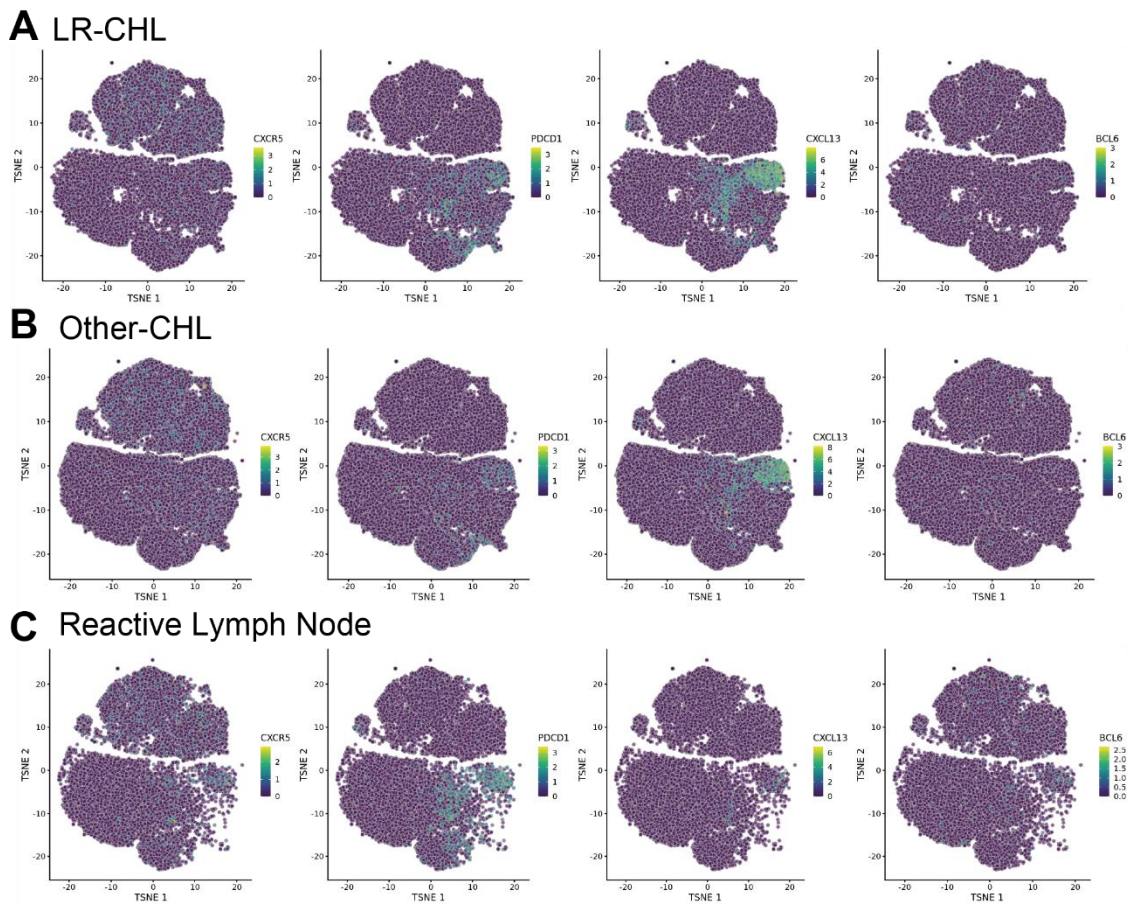

**Supplemental Figure 3**

**Fig. S3.** Expression of canonical markers for a follicular helper T cell phenotype (CXCR5, PDCD1 (PD-1), CXCL13 and BCL6) is shown for all cells in tSNE space according to disease subtype.



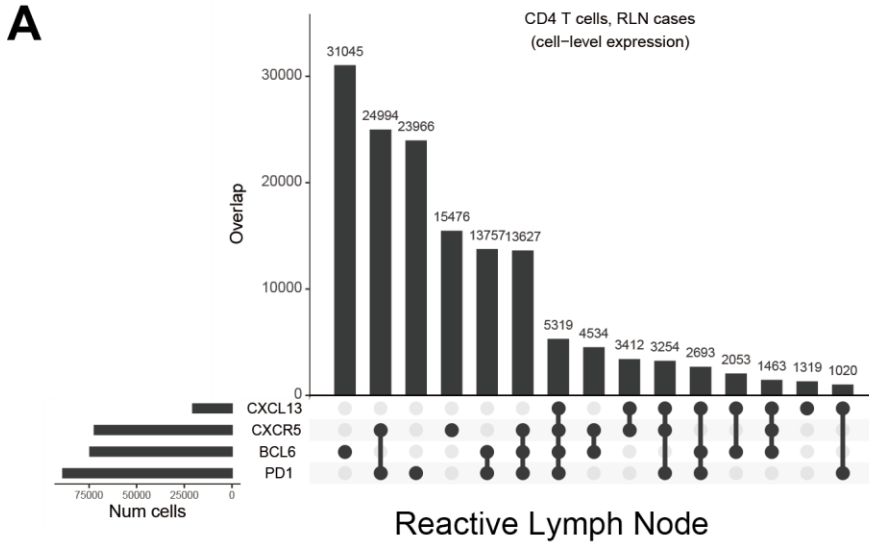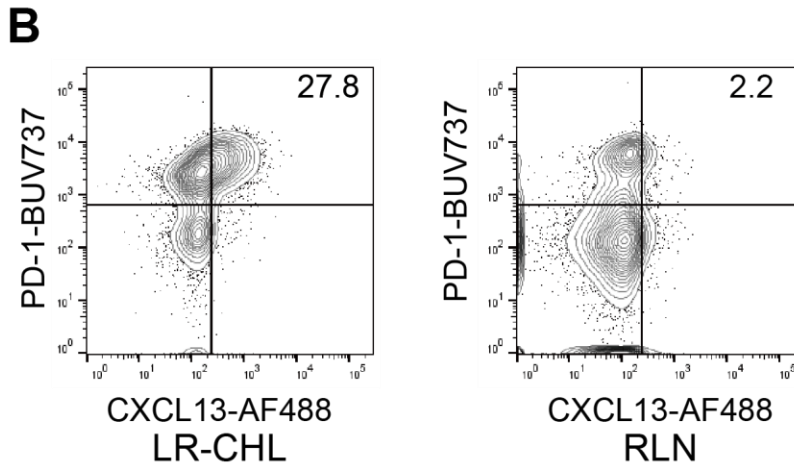

## Supplemental Figure 4

**Fig. S4. Co-expression pattern of TFH markers measured by flow cytometry. (A)** UpSet plot showing co-expression patterns on CD4<sup>+</sup> T cells in RLN by flow cytometry. **(B)** Representative flow cytometric analysis of PD-1 and CXCL13 expression on CD4<sup>+</sup> T cells from a primary LR-CHL patient sample (left) or RLN (right).

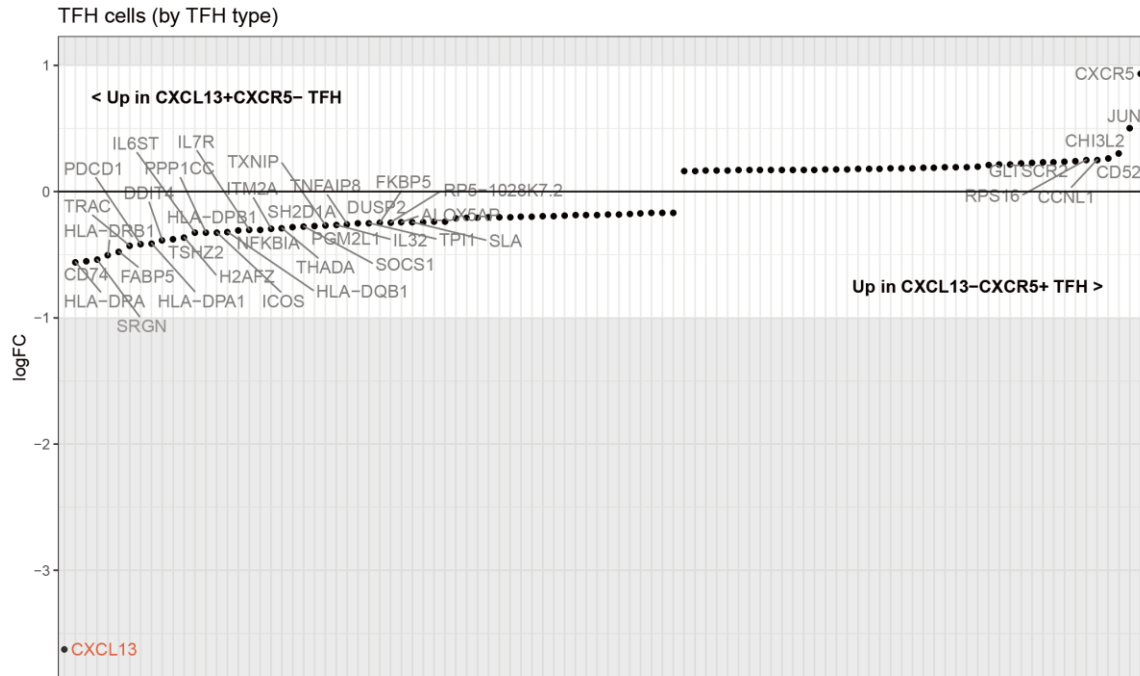

## Supplemental Figure 5

**Fig. S5. Differentially expressed genes between CXCL13<sup>+</sup>CXCR5<sup>-</sup> and CXCR5<sup>+</sup>CXCL13<sup>-</sup> cells in the helper T cell clusters.** The top 100 genes by absolute log<sub>2</sub> fold-change are shown on the x-axis, ordered by ascending log fold-change on the y-axis. The top 40 genes are labeled.

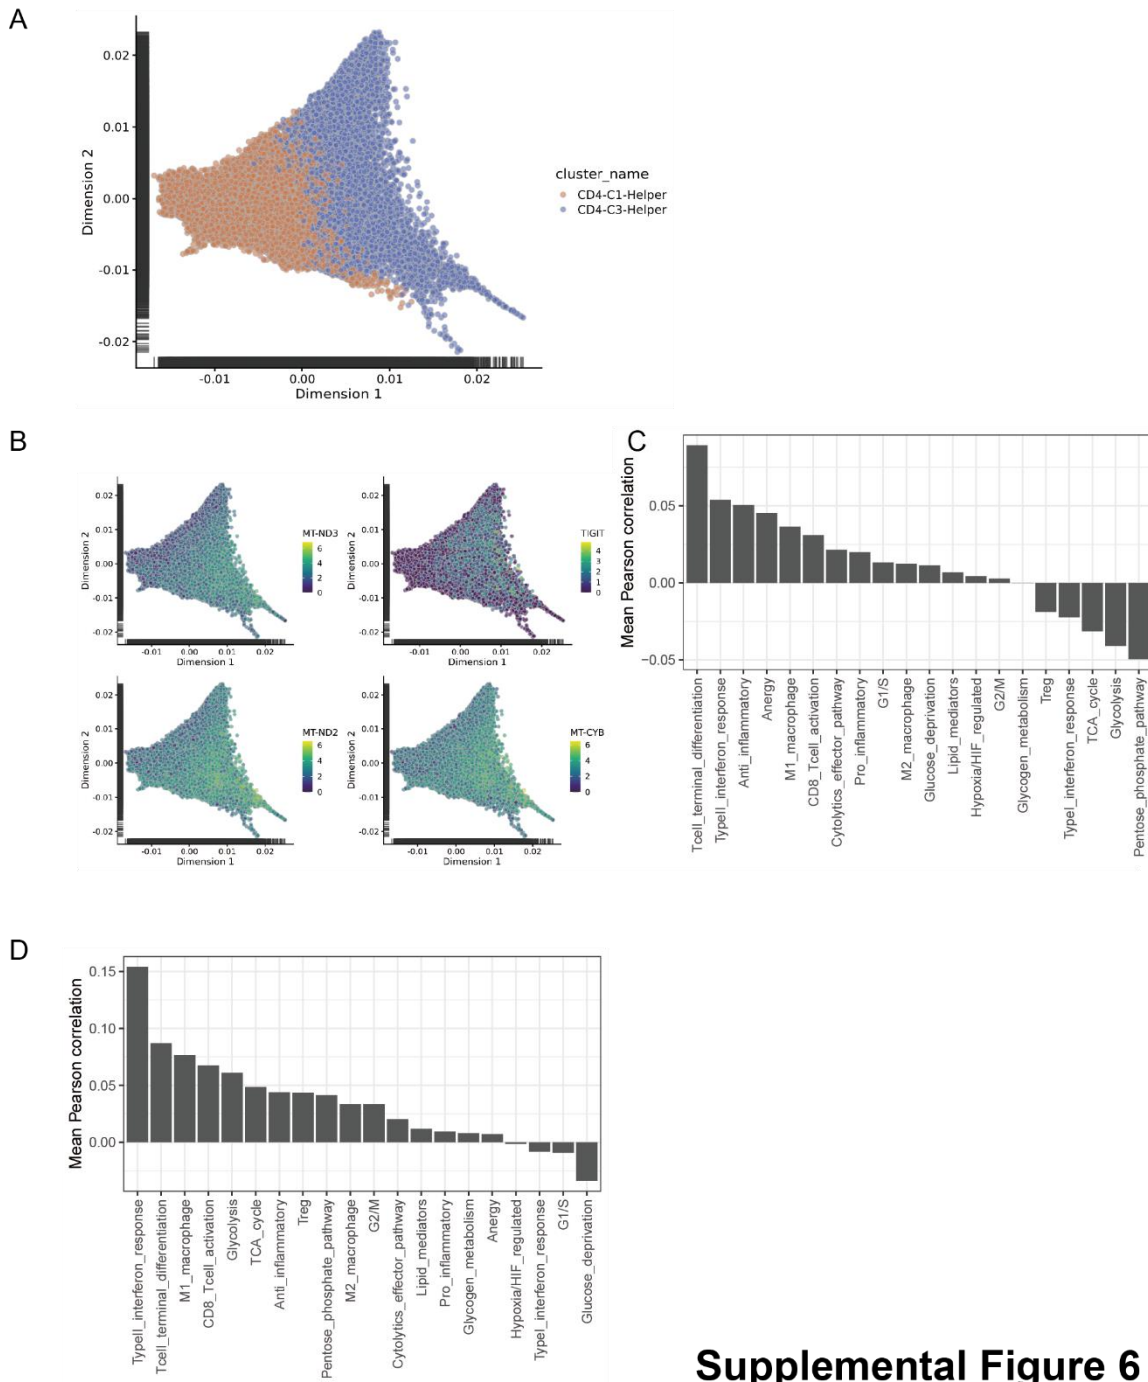

## Supplemental Figure 6

**Fig. S6. Association of diffusion map dimensions with cell signatures and individual genes.** (A) Cellular trajectories were inferred using diffusion map analysis of cells in all CD4<sup>+</sup> helper T cell clusters (“CD4-C1-Helper” and “CD4-C3-Helper”). Individual cells are shown in the first two resulting dimensions, and are colored according to cluster

assignment. (B) The expression of the 4 genes that were most positively correlated with dimension 1 score is shown in diffusion map space. (C-D) Bar graphs showing mean Pearson correlation between the genes in each signature (see *SI Appendix, Materials and Methods*) and diffusion map scores for dimension 1 (C) and 2 (D).

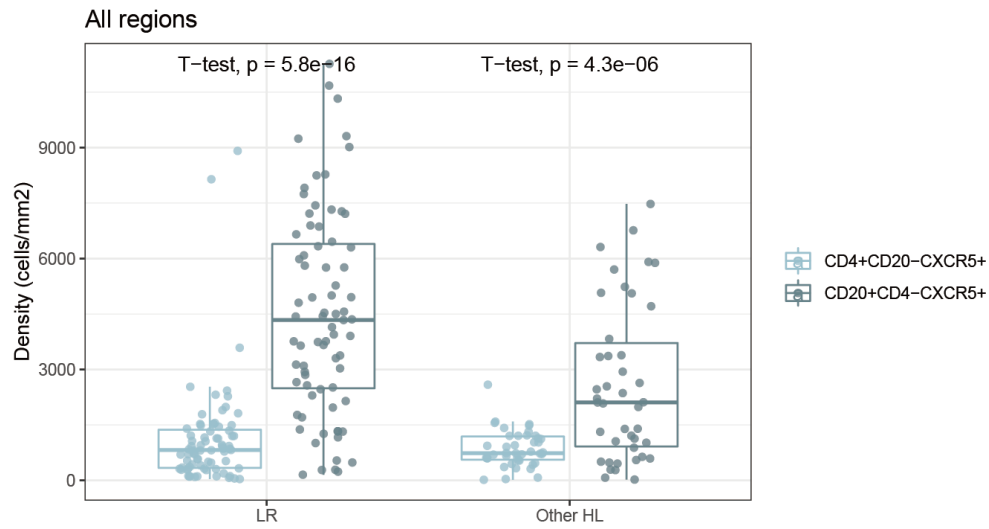

## Supplemental Figure 7

**Fig. S7. Density of CXCR5<sup>+</sup> cells in LR and other CHL.** Box plot showing the density of CD4<sup>+</sup>CD20<sup>-</sup>CXCR5<sup>+</sup> T cells and CD20<sup>+</sup>CD4<sup>-</sup>CXCR5<sup>+</sup> B cells in each histological subtype as assessed by multicolor IHC.

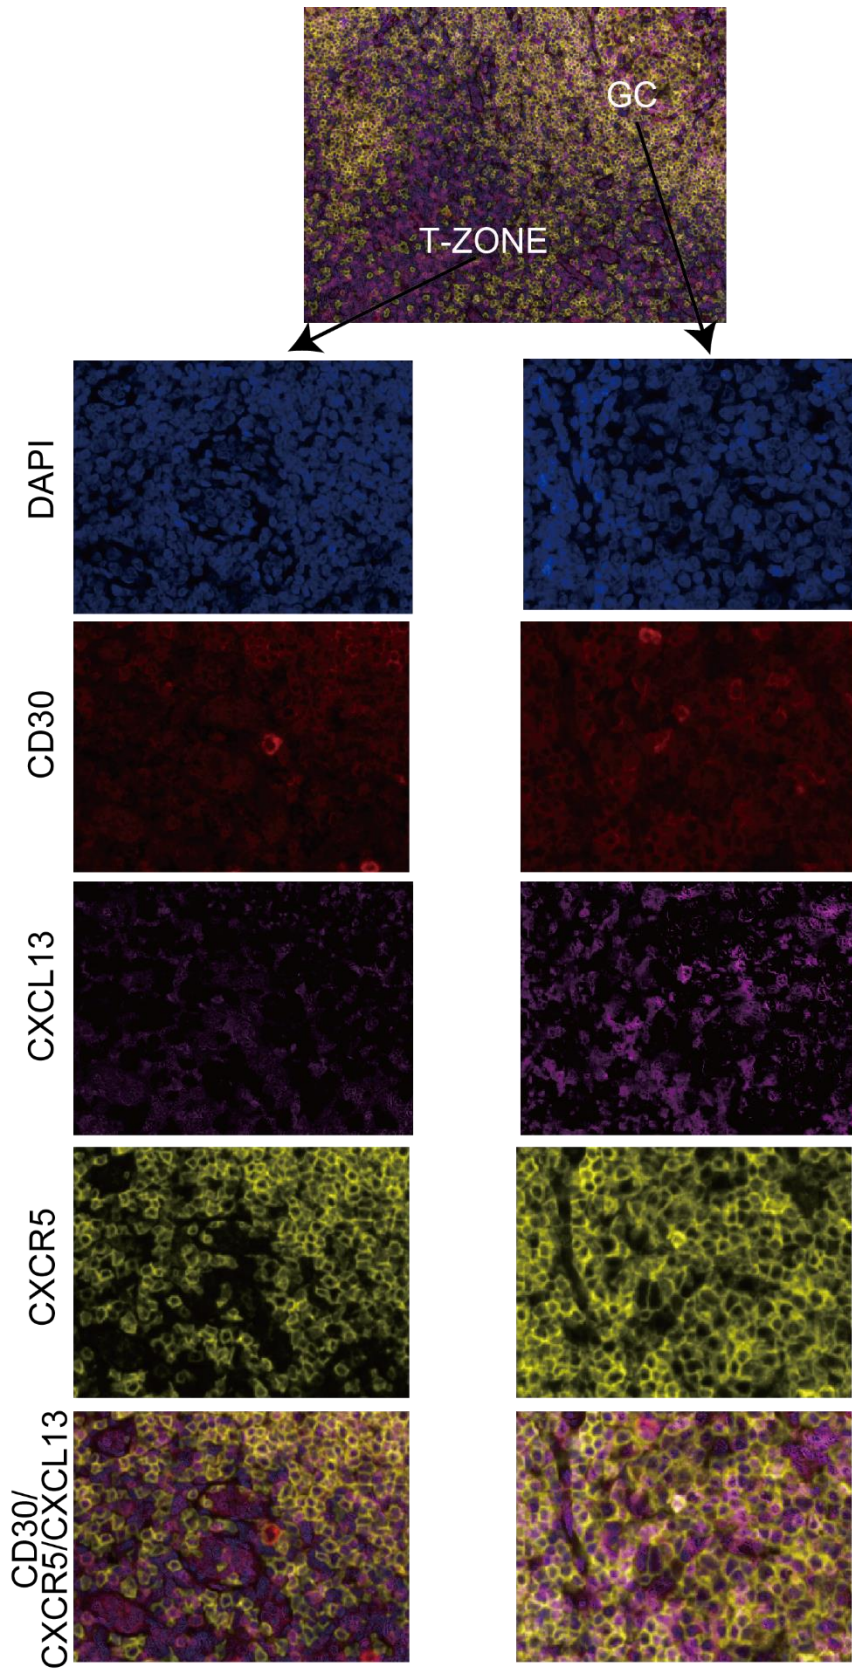

**Supplemental Figure 8**

**Fig. S8. Localization of CXCL13/CXCR5 positive cells in RLN tissue.** Multicolor IF staining in RLN for CD30 (red), CXCL13 (magenta) and CXCR5 (yellow) shows localization of CXCR5<sup>+</sup> cells near CXCL13<sup>+</sup> cells in the region of a germinal center (GC) and a T cell rich zone (T-ZONE) in reactive lymph node tissue. Cells with a typical TFH cell phenotype (PD1<sup>+</sup>CXCR5<sup>+</sup>CXCL13<sup>-</sup>) are enriched in these areas.

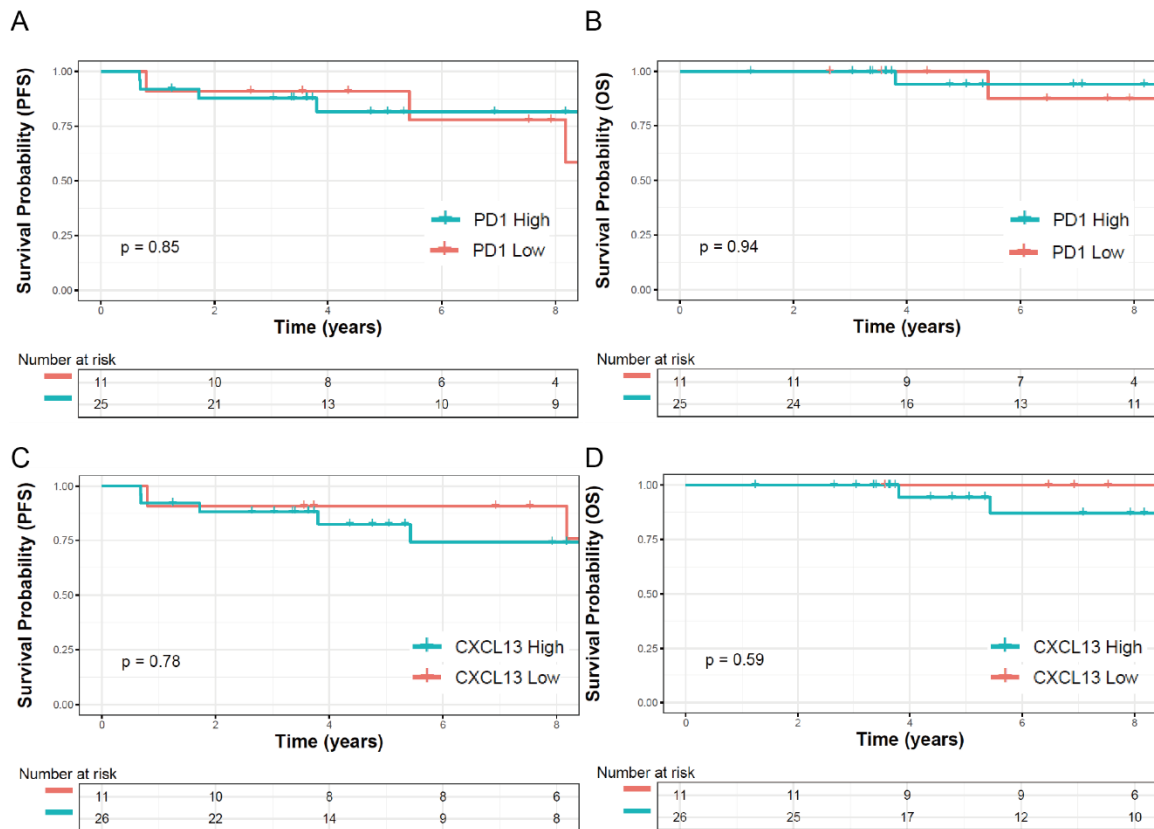

## Supplemental Figure 9

**Fig. S9. Survival analysis based on PD-1<sup>+</sup> and CXCL13<sup>+</sup> T cell proportions in LR-CHL.** (A-B) The Kaplan-Meier survival curves of LR-CHL patients according to PD-1<sup>+</sup> status for progression-free survival (A) and overall survival (B). (C-D) The Kaplan-Meier survival curves of LR-CHL patients according to CXCL13<sup>+</sup> status for progression-free survival (C) and overall survival (D).

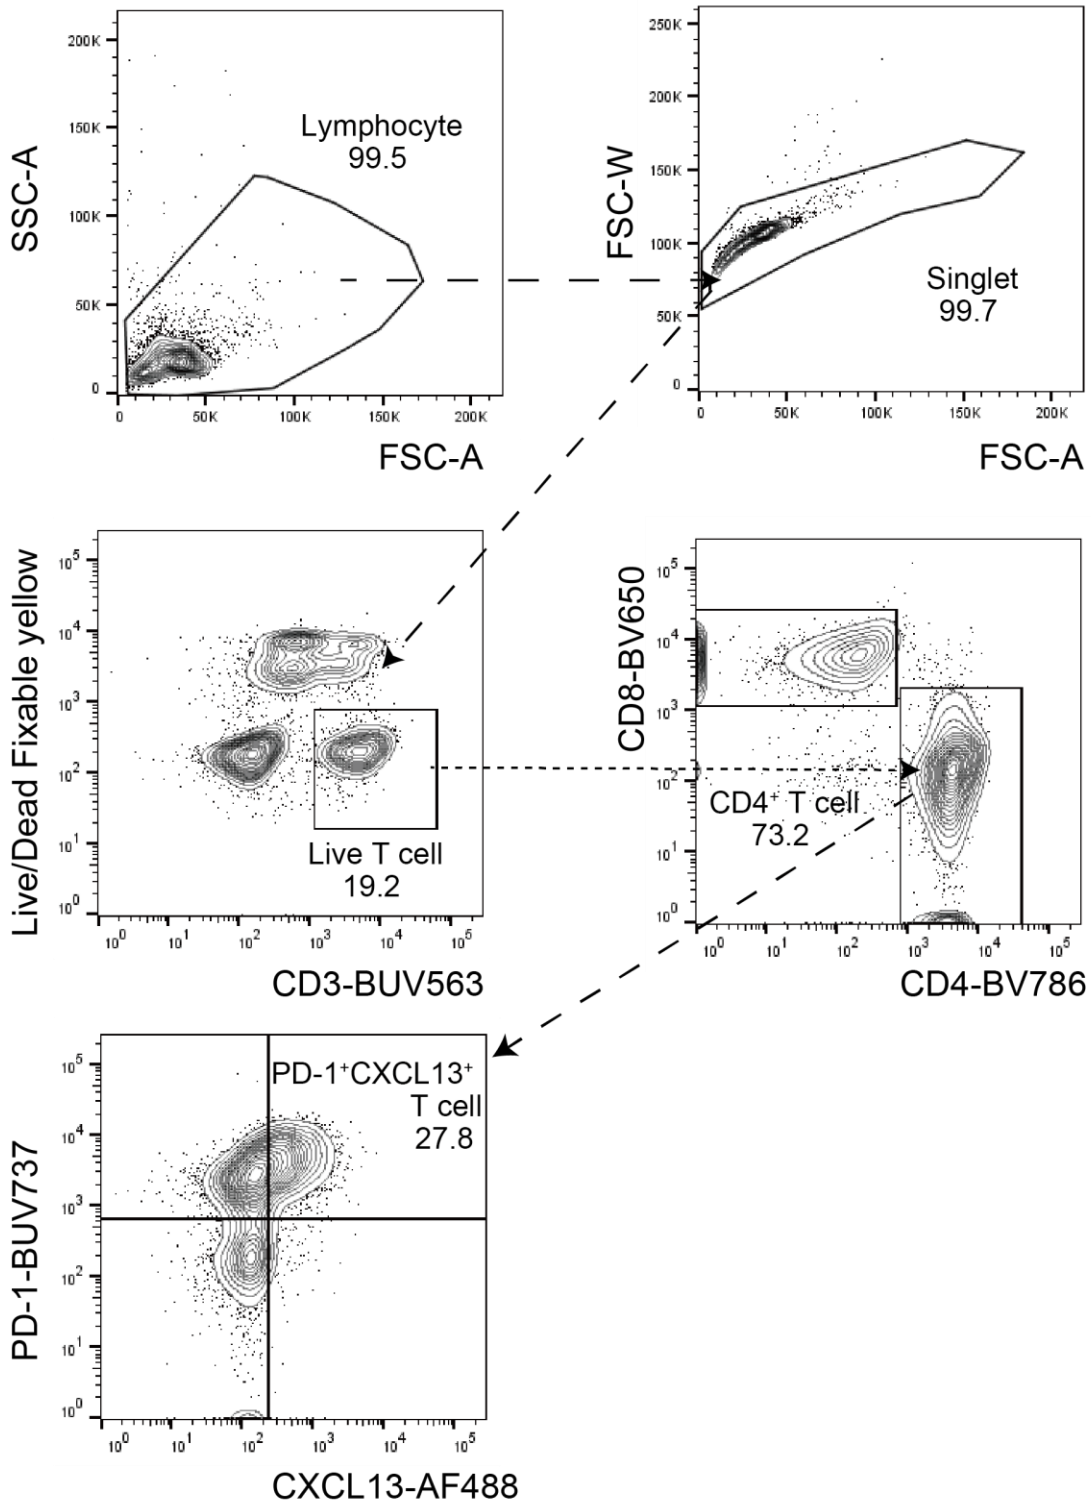

## Supplemental Figure 10

**Fig. S10. Gating strategy used to assess CXCL13 and PD-1 expression on CD4<sup>+</sup> T cells (CD3<sup>+</sup>CD4<sup>+</sup>).**

**Table S1. Patient characteristics of the CHL study cohort for single cell RNA sequencing. EBV: Epstein-Barr virus**

| Characteristic                                | All   |    | Nodular sclerosis |    | Mixed cellularity |    | Lymphocyte rich |    |
|-----------------------------------------------|-------|----|-------------------|----|-------------------|----|-----------------|----|
|                                               | No.   | %  | No.               | %  | No.               | %  | No.             | %  |
| Patient number                                | 28    |    | 11                |    | 9                 |    | 8               |    |
| Age at diagnosis (years)                      |       |    |                   |    |                   |    |                 |    |
| Median                                        | 46    |    | 39                |    | 35                |    | 52              |    |
| Range                                         | 20-75 |    | 26-67             |    | 20-75             |    | 29-59           |    |
| >60 years                                     | 4     | 14 | 2                 | 18 | 2                 | 18 | 0               | 0  |
| Gender, Male                                  | 21    | 75 | 7                 | 64 | 8                 | 89 | 6               | 75 |
| Advanced Stage                                | 9     | 32 | 5                 | 45 | 2                 | 25 | 2               | 25 |
| IPS (International Prognostic Score) $\geq$ 4 | 4     | 14 | 1                 | 9  | 1                 | 11 | 2               | 25 |
| Tumor size                                    |       |    |                   |    |                   |    |                 |    |
| Median (cm)                                   | 4     |    | 5                 |    | 4                 |    | 3               |    |
| $\geq$ 10                                     | 3     | 11 | 2                 | 18 | 1                 | 11 | 0               | 0  |
| EBV status positive                           | 6     | 21 | 0                 | 0  | 5                 | 56 | 1               | 13 |



**Table S2. Demographics and clinical and phenotypic characteristics of the CHL study cohort for single cell RNA sequencing.**  
 CHL: classic Hodgkin lymphoma; IPS: International Prognostic Score; EBV: Epstein-Barr Virus.

| Case  | Age | Gender | Disease Subtype   | Tumor Size    | Stage    | IPS           | EBV Infection |
|-------|-----|--------|-------------------|---------------|----------|---------------|---------------|
| CHL02 | 28  | Male   | Mixed Cellularity | 4             | 2A       | Not available | Positive      |
| CHL03 | 39  | Male   | Nodular Sclerosis | 2             | 3B       | Not available | Negative      |
| CHL04 | 51  | Male   | Mixed Cellularity | 2             | 1A       | 2             | Positive      |
| CHL05 | 67  | Female | Nodular Sclerosis | Not available | 3A       | Not available | Negative      |
| CHL06 | 64  | Male   | Nodular Sclerosis | 5             | 1A       | Not available | Negative      |
| CHL07 | 29  | Female | Nodular Sclerosis | 4             | 3A       | 1             | Negative      |
| CHL08 | 26  | Male   | Nodular Sclerosis | 5             | 2B       | 1             | Negative      |
| CHL09 | 55  | Female | Nodular Sclerosis | 3             | 3A       | 1             | Negative      |
| CHL10 | 29  | Female | Nodular Sclerosis | 10            | 2B       | 3             | Negative      |
| CHL11 | 22  | Male   | Mixed Cellularity | 4             | 2A       | 1             | Positive      |
| CHL12 | 35  | Male   | Mixed Cellularity | 4             | 4B       | 4             | Positive      |
| CHL13 | 31  | Male   | Mixed Cellularity | 5             | 3B       | 1             | Positive      |
| CHL14 | 53  | Male   | Mixed Cellularity | 4             | 2A       | 2             | Negative      |
| CHL15 | 20  | Female | Mixed Cellularity | 10            | 2A       | 2             | Negative      |
| CHL16 | 56  | Male   | Nodular Sclerosis | 5             | 2A       | Not available | Negative      |
| CHL17 | 29  | Male   | Nodular Sclerosis | 15            | 2A       | 1             | Negative      |
| CHL18 | 66  | Male   | Mixed Cellularity | Not available | 2B       | 3             | Negative      |
| CHL19 | 33  | Male   | Nodular Sclerosis | 8             | 2A       | Not available | Negative      |
| CHL20 | 75  | Male   | Mixed Cellularity | 3             | Unstaged | Not available | Negative      |
| CHL21 | 41  | Male   | Lymphocyte rich   | 8             | 4B       | 4             | Negative      |
| CHL22 | 56  | Male   | Nodular Sclerosis | 3             | 3A       | 4             | Negative      |
| CHL23 | 59  | Female | Lymphocyte rich   | 2             | 1A       | 0             | Negative      |
| CHL24 | 56  | Male   | Lymphocyte rich   | 2             | 1A       | 2             | Negative      |
| CHL25 | 41  | Female | Lymphocyte rich   | 2             | 2B       | 0             | Negative      |
| CHL26 | 56  | Male   | Lymphocyte rich   | 4             | 2B       | 2             | Negative      |
| CHL27 | 52  | Male   | Lymphocyte rich   | 2             | 2A       | 2             | Not available |
| CHL28 | 29  | Male   | Lymphocyte rich   | 5             | 4B       | 4             | Negative      |
| CHL29 | 52  | Male   | Lymphocyte rich   | 4             | 1A       | 2             | Positive      |

**Table S3. Sequencing metrics for the scRNA-seq cohort as determined by Cell Ranger.** CHL: classic Hodgkin lymphoma; RLN: reactive lymph node.

| Case     | Diagnosis | Batch info | Targeted Cell Recovery | Cells Sequenced | Mean Reads Per Cell | Sequencing Saturation (%) | Filtered cells | Median Genes Per Cell (filtered) |
|----------|-----------|------------|------------------------|-----------------|---------------------|---------------------------|----------------|----------------------------------|
| CHL02    | HL        | CHIP3      | 5000                   | 3099            | 28400               | 70.5                      | 3060           | 1018                             |
| CHL03    | HL        | CHIP3      | 5000                   | 5635            | 26906               | 70.9                      | 5511           | 1095                             |
| CHL04    | HL        | CHIP5      | 5000                   | 4490            | 29348               | 70.9                      | 4342           | 1143                             |
| CHL05    | HL        | CHIP4      | 5000                   | 4299            | 33276               | 72.2                      | 4220           | 1272                             |
| CHL06    | HL        | CHIP4      | 5000                   | 4411            | 29254               | 71.4                      | 4295           | 1210                             |
| CHL07    | HL        | CHIP3      | 5000                   | 5773            | 20457               | 62.1                      | 5600           | 1041                             |
| CHL08    | HL        | CHIP2      | 5000                   | 2756            | 48981               | 81.6                      | 2734           | 1119                             |
| CHL09    | HL        | CHIP2      | 5000                   | 4689            | 32889               | 77                        | 4637           | 1113                             |
| CHL10    | HL        | CHIP5      | 5000                   | 7216            | 19984               | 54.3                      | 7150           | 1341                             |
| CHL11    | HL        | CHIP5      | 5000                   | 4868            | 23096               | 65.9                      | 4738           | 1110                             |
| CHL12    | HL        | CHIP3      | 5000                   | 6972            | 16269               | 57.4                      | 6686           | 1066                             |
| CHL13    | HL        | CHIP2      | 5000                   | 4186            | 30651               | 73.4                      | 4097           | 1155                             |
| CHL14    | HL        | CHIP4      | 5000                   | 4454            | 29885               | 73.5                      | 4367           | 1217                             |
| CHL15    | HL        | CHIP4      | 5000                   | 3758            | 33830               | 74.5                      | 3667           | 1213                             |
| CHL16    | HL        | CHIP6      | 5000                   | 3558            | 43560               | 76.5                      | 3430           | 1229                             |
| CHL17    | HL        | CHIP6      | 5000                   | 5568            | 28260               | 67.1                      | 5489           | 1354                             |
| CHL18    | HL        | CHIP6      | 5000                   | 4426            | 34292               | 68.3                      | 4359           | 1522                             |
| CHL19    | HL        | CHIP6      | 5000                   | 5935            | 26345               | 66.5                      | 5902           | 1316.5                           |
| CHL20    | HL        | CHIP7      | 5000                   | 3561            | 43153               | 78.9                      | 3444           | 1236.5                           |
| CHL21    | HL        | CHIP7      | 5000                   | 4856            | 29832               | 73.7                      | 4764           | 1224                             |
| CHL22    | HL        | CHIP7      | 5000                   | 6443            | 26841               | 71.2                      | 6295           | 1140                             |
| CHL23    | HL        | CHIP8      | 5000                   | 3423            | 45194               | 82.6                      | 3287           | 1162                             |
| CHL24    | HL        | CHIP8      | 5000                   | 2778            | 54975               | 84.5                      | 2644           | 1252                             |
| CHL25    | HL        | CHIP8      | 5000                   | 3313            | 47083               | 82.7                      | 3134           | 1110.5                           |
| CHL26    | HL        | CHIP8      | 5000                   | 3074            | 47972               | 86.6                      | 2939           | 918                              |
| CHL27    | HL        | CHIP9      | 5000                   | 4283            | 34031               | 78.4                      | 4177           | 1023                             |
| CHL28    | HL        | CHIP9      | 5000                   | 3818            | 37552               | 75.8                      | 3649           | 1208                             |
| CHL29    | HL        | CHIP9      | 5000                   | 4539            | 33246               | 75.5                      | 4446           | 1065                             |
| RLN-1_R1 | RLN       | CHIP1      | 5000                   | 4582            | 31271               | 73.4                      | 4422           | 1152.5                           |
| RLN-1_R2 | RLN       | CHIP1      | 5000                   | 4709            | 33504               | 75.6                      | 4509           | 1132                             |
| RLN-2    | RLN       | CHIP9      | 5000                   | 4119            | 37843               | 76.1                      | 3956           | 1195                             |
| RLN-3    | RLN       | CHIP9      | 5000                   | 3493            | 40683               | 77                        | 3366           | 1260                             |
| RLN-4    | RLN       | CHIP9      | 5000                   | 3802            | 35345               | 69.8                      | 3629           | 1366                             |
| RLN-5    | RLN       | CHIP9      | 5000                   | 3725            | 37604               | 72.6                      | 3492           | 1279                             |

**Table S4. Demographics and clinical and phenotypic characteristics of the LR-CHL tissue microarray cohort.**

LRCHL: Lymphocyte rich classic Hodgkin lymphoma; EBV: Epstein-Barr Virus.

| <b>Case</b> | <b>Age</b> | <b>Gender</b> | <b>Disease Subtype</b> | <b>Stage</b> | <b>EBV Infection</b> |
|-------------|------------|---------------|------------------------|--------------|----------------------|
| LRCHL01     | 63         | Male          | Lymphocyte rich        | 3A           | Negative             |
| LRCHL02     | 38         | Male          | Lymphocyte rich        | 1A           | Negative             |
| LRCHL03     | 61         | Male          | Lymphocyte rich        | 1A           | Negative             |
| LRCHL04     | 62         | Female        | Lymphocyte rich        | 2A           | Negative             |
| LRCHL05     | 51         | Male          | Lymphocyte rich        | 2A           | Negative             |
| LRCHL06     | 34         | Female        | Lymphocyte rich        | 3B           | Negative             |
| LRCHL07     | 24         | Male          | Lymphocyte rich        | 2A           | Negative             |
| LRCHL08     | 87         | Female        | Lymphocyte rich        | 2B           | Negative             |
| LRCHL09     | 70         | Female        | Lymphocyte rich        | 2A           | Negative             |
| LRCHL10     | 24         | Male          | Lymphocyte rich        | 4A           | Negative             |
| LRCHL11     | 79         | Male          | Lymphocyte rich        | 2B           | Negative             |
| LRCHL12     | 63         | Male          | Lymphocyte rich        | 1A           | Negative             |
| LRCHL13     | 47         | Male          | Lymphocyte rich        | 2A           | Negative             |
| LRCHL14     | 78         | Female        | Lymphocyte rich        | 2A           | Negative             |
| LRCHL15     | 67         | Male          | Lymphocyte rich        | 1A           | Positive             |
| LRCHL16     | 47         | Male          | Lymphocyte rich        | 3A           | Positive             |
| LRCHL17     | 57         | Male          | Lymphocyte rich        | 3B           | Positive             |
| LRCHL18     | 50         | Male          | Lymphocyte rich        | 3A           | Negative             |
| LRCHL19     | 69         | Male          | Lymphocyte rich        | 2A           | Negative             |
| LRCHL20     | 44         | Male          | Lymphocyte rich        | 1A           | Negative             |
| LRCHL21     | 55         | Male          | Lymphocyte rich        | 1A           | Positive             |
| LRCHL22     | 61         | Female        | Lymphocyte rich        | 2A           | Negative             |
| LRCHL23     | 46         | Male          | Lymphocyte rich        | 4A           | Negative             |
| LRCHL24     | 14         | Female        | Lymphocyte rich        | NA           | Positive             |
| LRCHL25     | 40         | Male          | Lymphocyte rich        | 2A           | Negative             |
| LRCHL26     | 58         | Male          | Lymphocyte rich        | 1A           | Positive             |
| LRCHL27     | 70         | Male          | Lymphocyte rich        | 1A           | Negative             |
| LRCHL28     | 62         | Male          | Lymphocyte rich        | 1A           | Negative             |
| LRCHL29     | 81         | Male          | Lymphocyte rich        | 2A           | Negative             |
| LRCHL30     | 71         | Female        | Lymphocyte rich        | 4A           | Negative             |
| LRCHL31     | 38         | Male          | Lymphocyte rich        | 1A           | Negative             |

**Table S5. Patient characteristics of the entire LR-CHL cohort for survival analyses.** LR-CHL: lymphocyte rich classic Hodgkin lymphoma, EBV: Epstein-Barr virus.

| Characteristic                                | All |       | CD4/PD-1/CXCL13 High |       | CD4/PD-1/CXCL13 Low |       | P-value |
|-----------------------------------------------|-----|-------|----------------------|-------|---------------------|-------|---------|
|                                               | No. | %     | No.                  | %     | No.                 | %     |         |
| Patient number                                | 37  |       | 12                   |       | 25                  |       |         |
| Age at diagnosis (years)                      |     |       |                      |       |                     |       |         |
| Median                                        |     | 56    |                      | 54    |                     | 56    |         |
| Range                                         |     | 14-81 |                      | 24-81 |                     | 14-79 |         |
| >60 years                                     | 14  | 38    | 5                    | 42    | 9                   | 36    | 0.28    |
| Gender, Male                                  | 23  | 62    | 6                    | 50    | 17                  | 68    | 0.47    |
| Advanced Stage                                | 13  | 35    | 5                    | 42    | 8                   | 32    | 0.72    |
| IPS (International Prognostic Score) $\geq 4$ | 3   | 8     | 1                    | 8     | 2                   | 8     | > 0.99  |
| Tumor size                                    |     |       |                      |       |                     |       |         |
| Median (cm)                                   | 4   |       |                      |       |                     |       |         |
| $\geq 10$                                     | 0   | 0     | 0                    | 0     | 0                   | 0     | > 0.99  |
| EBV status positive                           | 6   | 16    | 2                    | 17    | 4                   | 16    | > 0.99  |

**Table S6. Univariate analyses of prognostic factors' effect on progression-free survival (PFS) in LR-CHL patients (N = 37).**

| <b>Clinical feature</b>     | <b>P-value for PFS</b> |
|-----------------------------|------------------------|
| Age $\geq$ 45               | 0.28                   |
| Sex, Male                   | 0.86                   |
| Advanced Stage              | 0.24                   |
| IPS                         | 0.40                   |
| EBV, positive               | 0.96                   |
| CXCL13                      | 0.78                   |
| PD1                         | 0.85                   |
| <u>CD4/PD-1/CXCL13 High</u> | <u>0.04</u>            |

**Table S7. Antibodies used for immunohistochemistry staining.**

| <b>Antigen</b> | <b>Antibody Clone</b> | <b>Manufacturer</b> | <b>Catalog number</b> |
|----------------|-----------------------|---------------------|-----------------------|
| CD30           | CON6D/B5              | Biocare             | CM346                 |
| CD4            | EPR6855               | Abcam               | ab133616              |
| CXCL13         | 53610                 | R & D system        | MAB801                |
| CXCR5          | EPR23463-30           | Abcam               | ab254415              |
| PD-1           | MRQ22                 | Cell Marque         | 315M                  |
| PD-1           | NAT105                | Cell Marque         | 315M-94               |
| CD20           | L26                   | Dako                | M0755                 |
| CD20           | L26                   | Bio Care Medical    | CM004                 |
| PD-L1          | SP142                 | Abcam               | ab228462              |
| TGF-b          | EPR21143              | Abcam               | ab215715              |
| BCL6           | LN22                  | Bio Care Medical    | CM410A                |

**Table S8. Antibodies used for flow cytometry.**

| <b>Antigen</b> | <b>Fluorescence</b> | <b>Antibody Clone</b> | <b>Manufacturer</b> | <b>Catalog number</b> | <b>Lot number</b> |
|----------------|---------------------|-----------------------|---------------------|-----------------------|-------------------|
| CD3            | BUV563              | SK7                   | BD Biosciences      | 741448                | 9233566           |
| CD4            | BV786               | SK3                   | BD Biosciences      | 563877                | 8353751           |
| CD8            | BV650               | RPA-T8                | BD Biosciences      | 563821                | 9073878           |
| CXCR5          | APC-Cy7             | J252D4                | BioLegend           | 356926                | B290954           |
| CXCL13         | AF488               | 53610                 | R & D System        | IC801G                | 1554733           |
| PD-1           | BUV737              | EH12.1                | BD Biosciences      | 612791                | 9212298           |
| ICOS           | PE-Cyanine7         | ISA-3                 | Invitrogen          | 25-9948-42            | 1989135           |
| BCL-6          | BV421               | K112-91               | BD Biosciences      | 563363                | 9322764           |
| CD20           | PE-Cyanine7         | B9E9                  | Beckman Coulter     | IM3629                | 200068            |
